1 **The origin and maintenance of microbial symbionts in *Drosophila***  
2 **larvae**

3

4 Robin Guilhot<sup>1\*</sup>, Auxane Lagmairi<sup>1</sup>, Laure Olazcuaga<sup>1</sup>, Anne Xuéreb<sup>1</sup>, Simon Fellous<sup>1</sup>

5 <sup>1</sup> CBGP, INRAE, CIRAD, IRD, Montpellier SupAgro, Univ Montpellier, Montpellier, France

6 \*corresponding author's email address: [guilhorogmail.com](mailto:guilhorogmail.com)

7

8 **Abstract**

9 Little is known on the origin and maintenance of symbionts associated with *Drosophila* larvae  
10 *in natura*, which restricts the understanding of *Drosophila*-extracellular microorganism  
11 symbiosis in the light of evolution. Here, we studied the origin and maintenance of symbionts  
12 of *Drosophila* larvae under ecologically realistic conditions, to our knowledge for the first  
13 time, using yeast and bacterial isolates and two *Drosophila* species: the model organism *D.*  
14 *melanogaster* and the invasive pest *D. suzukii*. We discovered that *Drosophila* females and  
15 males both transmit yeast and bacteria symbionts to larvae. In addition, several symbiotic  
16 yeasts initially associated with larvae were conserved throughout host life cycle and  
17 transmitted to offspring. Our results suggest that stable associations of *Drosophila* flies with  
18 bacteria and yeasts may exist *in natura* and constitute a step forward in the understanding of  
19 wild *Drosophila* -microorganism symbioses.

## 20 **Context**

21 The origin of microbial symbionts of eukaryotes influences the evolution of symbiosis.  
22 Microbial symbionts can be acquired from parents (i.e. vertically transmitted symbionts)  
23 (Funkhouser & Bordenstein 2013), from unrelated hosts (i.e. horizontally transmitted  
24 symbionts) (Gonella *et al.* 2012), a mix of both (i.e. mixed-mode transmitted symbionts)  
25 (Ebert 2013; Quigley *et al.* 2018) or from the environment (Kikuchi *et al.* 2007). Theory  
26 predicts that symbionts that persist between host life stages and host generations are more  
27 likely to initiate stable mutualistic relationships compared to symbionts acquired from the  
28 host environment (Antonovics *et al.* 2017; Bright & Bulgheresi 2010; Fisher *et al.* 2017;  
29 Gerardo & Hurst 2017; Lipsitch *et al.* 1996; Sachs *et al.* 2004; Shapiro & Turner 2014).  
30 Understanding the evolution of host-microbe symbiosis is therefore only possible when means  
31 of host-microbe association are properly documented.

32 In *Drosophila* flies, numerous studies conducted under laboratory conditions investigated the  
33 origin of extracellular microbial symbionts associated with larvae and the persistence of larval  
34 symbionts throughout host life cycle (Bakula 1969; Becher *et al.* 2012; Pais *et al.* 2018; Téfit  
35 *et al.* 2018). However, little is known on the origin and maintenance of symbionts associated  
36 with *Drosophila* larvae *in natura*, which restricts the understanding of *Drosophila*-  
37 extracellular microorganism symbiosis in the light of evolution. We explored these  
38 phenomena under ecologically realistic conditions, to our knowledge for the first time, using -  
39 mainly wild - yeast and bacterial isolates and two *Drosophila* species of major interest: the  
40 model organism *D. melanogaster* and the invasive pest *D. suzukii*.

41

## 42 **Results and Discussion**

### 43 ***Drosophila* females transmit extracellular symbionts to their offspring**

44 Previous reports showed *D. melanogaster* maternal transmission of yeasts and bacteria in  
45 laboratory conditions (Bakula 1969; Becher *et al.* 2012; Rohlf and Hoffmeister 2005;  
46 Spencer *et al.* 1992; Téfit *et al.* 2018). We hypothesized that *Drosophila* mothers may  
47 transmit their microbial symbionts to larvae in a context where other microorganisms are  
48 present on the oviposition substrate. We also predicted that *D. suzukii* maternal transmission  
49 may be more frequent than that of *D. melanogaster* because *D. suzukii* females typically lay their

50 eggs on unwounded, ripening fruits poorly colonized by microorganisms (Lewis & Hamby  
51 2019). *D. suzukii* eggs are inserted in fruit flesh thanks to females' serrated ovipositors. As a  
52 result, the newly emerged larvae may primarily recruit microbial symbionts deposited by the  
53 mother. By contrast, *D. melanogaster* females lay their eggs on fruit wounds and rotten fruits  
54 already colonized by a variety of microorganisms (data not shown, will be available in the  
55 next version of this work). To test these predictions, we used mature females of one *D. suzukii*  
56 population and one *D. melanogaster* population and six microbial symbionts (see Materials  
57 and Methods for details on their choice). The same microbial strains were used for all the  
58 experiments presented in our study. Briefly, individual mated female associated with an  
59 artificial microbial community composed of one bacterium and one yeast strain were offered  
60 to oviposit on a blueberry which surface had been inoculated with a different microbial  
61 community (i.e. another bacterium and another yeast) (Figure 1A). For *D. melanogaster*  
62 assays the berry was slightly wounded while kept unwounded for *D. suzukii* assays. Five days  
63 after fruit exposure, numerous berries contained larvae associated with female microbial  
64 symbionts, fruit-surface microorganism or both (Figure 1B).

65 Contrary to our expectations, maternal transmission was no greater in *D. suzukii* than in *D.*  
66 *melanogaster*. However, symbiont identity affected both maternal transmission and  
67 environmental acquisition (Table S1). One yeast strain, *Trigonopsis vinaria* isolated from *D.*  
68 *suzukii* ovaries was transmitted significantly more from *D. melanogaster* than from *D. suzukii*  
69 females ( $\chi^2 = 5.25$ ,  $df = 1$ ,  $p = 0.0220$ ) (Figure 1C, Table S1). Symbiont transmission differed  
70 whether they were in females or on fruit, which suggests acquisition of maternal symbionts by  
71 offspring is controlled by interactions between females and symbionts rather than symbiont's  
72 sheer properties. Our work indicates *D. suzukii* and *D. melanogaster* maternal transmission of  
73 extracellular symbionts may be frequent in field conditions.

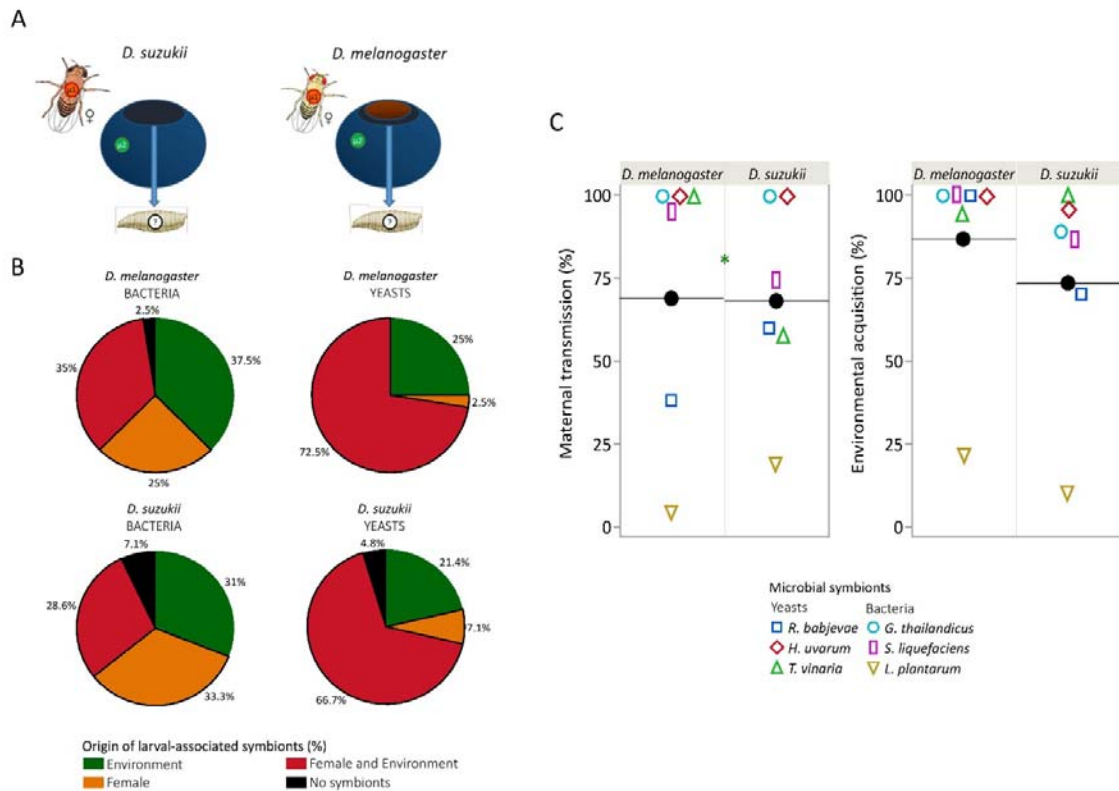

74

75 **Figure 1.** *Drosophila* larvae associate with maternal symbionts and environmental  
 76 symbionts. (A) Experimental design. Three different microbial communities ( $\mu_i$ ) composed of  
 77 a yeast and a bacterium species were permuted between flies and fruits.  $n = 40$  *D.*  
 78 *melanogaster* experimental units;  $n = 42$  *D. suzukii* experimental units. (B) *Drosophila* larvae  
 79 frequently harbored maternal symbionts and those already present on fruit skin. (C)  
 80 Maternal transmission and environmental acquisition rates (% of larvae pools). The black dot  
 81 symbolizes the general mean (i.e. independently of the microbial symbiont) and the open  
 82 symbols the proportion for each of the six microorganisms tested.

83

## 84 Male transmission of microbial symbionts

85 How microorganisms reach fruit skin, where they are recruited by *Drosophila* larvae, is  
 86 unclear. Insects, such as wasps, participate to baker's yeast spread at the landscape level  
 87 (Stefanini *et al.* 2012). Field observations showed *Drosophila* males often sit on fruit, a  
 88 behavior that we also witnessed in lab macrocosms (SM2). We hence hypothesized  
 89 *Drosophila* males may deposit their symbionts on fruit surface and therefore contribute to the  
 90 larval microbiota. *D. melanogaster* males can be territorial, can form leks and defend  
 91 oviposition sites (Drapeau *et al.* 2011; Hoffmann and Cacoyianni 1990). Because *D.*  
 92 *melanogaster* males are present on fruit wounds (i.e. oviposition sites), where microorganisms

93 could grow better than on fruit skin, we predicted greater male transmission from *D.*  
94 *melanogaster* than from *D. suzukii*. In a new experiment we tested whether *Drosophila* males  
95 actually transmitted their microbial symbionts to offspring of conspecific females (Figure  
96 2A). Individual males were given single blueberries for 24 h until single females were added  
97 for another 24 h. As before, males, females and fruits were all associated with different  
98 microbial communities.

99 Male transmission to larvae was pervasive and twice more frequent for *D. melanogaster* (c.  
100 50% of fruits) than *D. suzukii* (c. 25%) (Figures 2B and 2C). The transmission by males of the  
101 microorganisms widely depended on strain identity. For example, the yeast *H. uvarum* was  
102 always transmitted by *D. melanogaster* males while the yeast *R. babjevae* was never found in  
103 larvae. Female transmission was slightly lower than that of in the first experiment, with  
104 different behaviors of the microbial strains (Figure 2C, Table S3). The transmission potential  
105 of the symbiont strains appeared different in males and females and among experiments in  
106 females suggesting this aspect of strain biology is very context-sensitive.

107 How did males transmit their symbionts? We recorded the time they spent on oviposition  
108 areas but this variable did not correlate significantly with the transmission of their symbionts  
109 to larvae (Table S3). Male transmission is therefore not determined by the amount of  
110 microbial cells they shed on oviposition sites. Similarly, we recorded whether males and  
111 females mated during the experiment. These events were rare ( $n = 7/21$  observations for *D.*  
112 *melanogaster* and  $n = 2/27$  for *D. suzukii*) and did not influence significantly male  
113 transmission (Table S3). This suggests that male transmission of symbionts to larvae did not  
114 depend from male presence on oviposition sites and did not clearly involve sexual  
115 transmission to females (Miest and Bloch-Qazi 2008; Rohlf and Hoffmeister 2005; Starmer,  
116 Peris and Fontdevila 1988). Independent of the mechanisms, the transmission of symbionts by  
117 *Drosophila* males may have consequences for the evolution of symbionts effects on males.  
118 Microorganisms may change male characters so as to favor their transmission. Because  
119 symbiont transmission is not contingent upon male reproduction (i.e. no male vertical  
120 transmission), selection may not select against symbiont costs to male fitness (Sachs 2004;  
121 Ebert 2013). However, the largest *D. melanogaster* males would be most likely to  
122 successfully defend oviposition sites (Hoffmann 1987). Therefore, symbionts of male larvae  
123 would be selected for beneficial effects on their development, assuming that extracellular  
124 symbionts of larvae remain associated with their hosts after metamorphosis and until they  
125 reproduce.

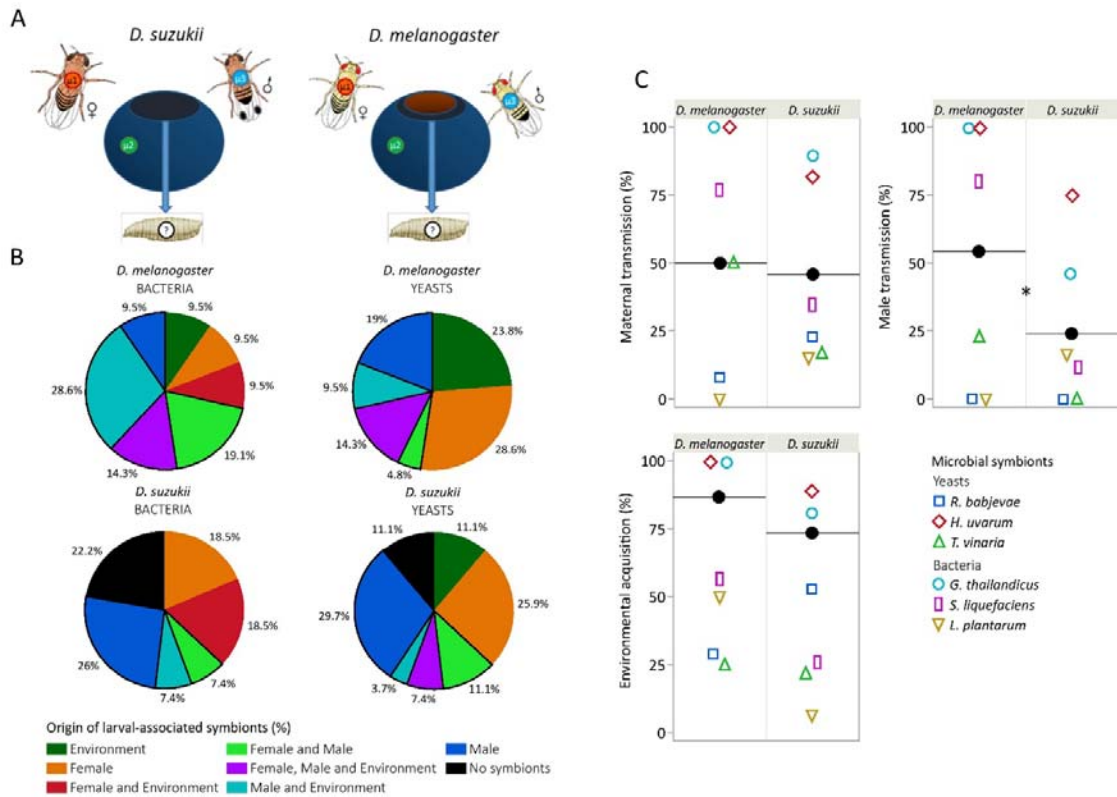

126

127 **Figure 2.** *Drosophila* larvae associate with male symbionts, maternal symbionts and  
 128 environmental symbionts. (A) Experimental design. Three different microbial communities  
 129 ( $\mu_i$ ) composed of a yeast and a bacterium species were permuted between flies and fruit.  $n =$   
 130  $21$  *D. melanogaster* experimental units;  $n = 27$  *D. suzukii* experimental units. (B) *Drosophila*  
 131 larvae frequently harbored symbionts of both male and female as well as those already  
 132 present on fruit skin. (C) Proportion of cases where larvae contained male, female and fruit  
 133 symbionts (% of larval pools). The black dot symbolizes the general mean (i.e. independently  
 134 of the microbial symbiont) and the open symbols the proportion for each of the 6  
 135 microorganisms tested.

136

### 137 Larval yeast symbionts maintain through the entire life cycle and transmit 138 to the progeny

139 Do extracellular symbionts of *Drosophila* larvae maintain until adult life? Several studies  
 140 have shown symbionts of larvae can be found in adults (i.e. transstadial transmission,  
 141 maintenance through metamorphosis) (Bakula 1969; Duneau and Lazzaro 2018; Ridley *et al.*  
 142 2012; Starmer, Peris and Fontdevila 1988). However, in most experiments larvae and adults  
 143 shared the same containers hence permitting indirect, environmental transmission (but see  
 144 Bakula 1969). In the field, *Drosophila* last-instar larvae mainly pupate outside the larval

145 environment, usually in soil (Reaume & Sokolowski 2006; Woltz & Lee 2017). This behavior  
146 was mimicked in a new experiment where *Drosophila* larvae were associated with one of  
147 three yeast strains, newly formed pupae isolated in independent containers and adult microbial  
148 content assayed shortly after emergence (Figure 3A).

149 Almost a quarter and a half of young *D. suzukii* and *D. melanogaster* adults tested positive for  
150 larval symbionts (cell numbers were however usually low). *Trigonopsis vinaria* yeast,  
151 isolated from *D. suzukii* ovaries, best maintained through host metamorphosis while our strain  
152 of *Hanseniaspora uvarum*, a species frequently found in wild Drosophilids, exhibited poor  
153 transstadial transmission ( $\chi^2 = 0.0188$ ,  $df = 2$ ,  $p = 0.0188$ ) (Figure 3B). Fly species and adult  
154 sex had marginally non-significant influences on yeast transstadial maintenance (for both,  $\chi^2 =$   
155  $3.70$ ,  $df = 1$ ,  $p = 0.0544$ ) (Figure 3B). Overall, yeast symbionts of larvae maintained until  
156 adult emergence, but what would become of them remained to be determined.

157 Numerous laboratory experiments indicate adult symbiotic community mirrors that of their  
158 surrounding environment due to the constant replacement of gut microbial communities  
159 during feeding (Blum *et al.* 2013; Ma & Leulier 2018). However, other work shows adult  
160 association with some nutritional symbionts, in particular those recently isolated from the  
161 field, may be stable (Pais *et al.* 2018; Obadia *et al.* 2017). We continued the previous  
162 experiment in order to determine whether yeast present in young adults, and acquired at the  
163 larval stage, maintained through life and until the next generation (Figure 3A). Freshly  
164 emerged adults associated with one of three yeast strains were maintained for five days with a  
165 halved grape berry inoculated with a second yeast strain (i.e. first environmental symbiont in  
166 Figure 3A) and another two days with berries inoculated with a third strain (i.e. third  
167 environmental symbiont). These adults were then offered a surface-sterilized berry to  
168 oviposit. The microbial content of adults at the time of oviposition and that of F1 larvae was  
169 assayed.

170 Unexpectedly, yeast symbionts of larval origin largely maintained despite a one-week  
171 exposure to two successive sources of environmental yeasts (Figure 3C, Table S4). The  
172 second environmental yeast was less frequent in adults compared to the first (Figure 3C).  
173 Even if the time of adult exposure to symbionts may affect host acquisition (as in Obadia *et*  
174 *al.* 2017), it should be mentioned we did not monitor microbial development in the grape  
175 berries the flies were exposed to for five and two days, respectively. It is therefore possible  
176 flies inoculated them with the strains they harbored, hence favoring the multiplication of  
177 larval and first environmental symbionts in our microcosms and their subsequent re-

178 inoculation to adults. Incidentally, it could explain the greater prevalence of larval yeast in old  
179 adults than in young adults (compare Figures 3B and 3C). Nonetheless, the majority of *D.*  
180 *melanogaster* larvae of the following generation bore symbionts their parents were first  
181 exposed to at the larval stage (proportion of larvae with the larval symbionts of their parents:  
182 0.69 (95% CI [0.44, 0.86])) (Figure 3D). This experiment shows that, in field-realistic  
183 conditions, symbiotic yeasts associated with *D. melanogaster* and *D. sukuii* larvae are  
184 conserved in young adults despite metamorphosis and illustrate symbiont persistence  
185 throughout host life cycle until they are transmitted to a new generation.



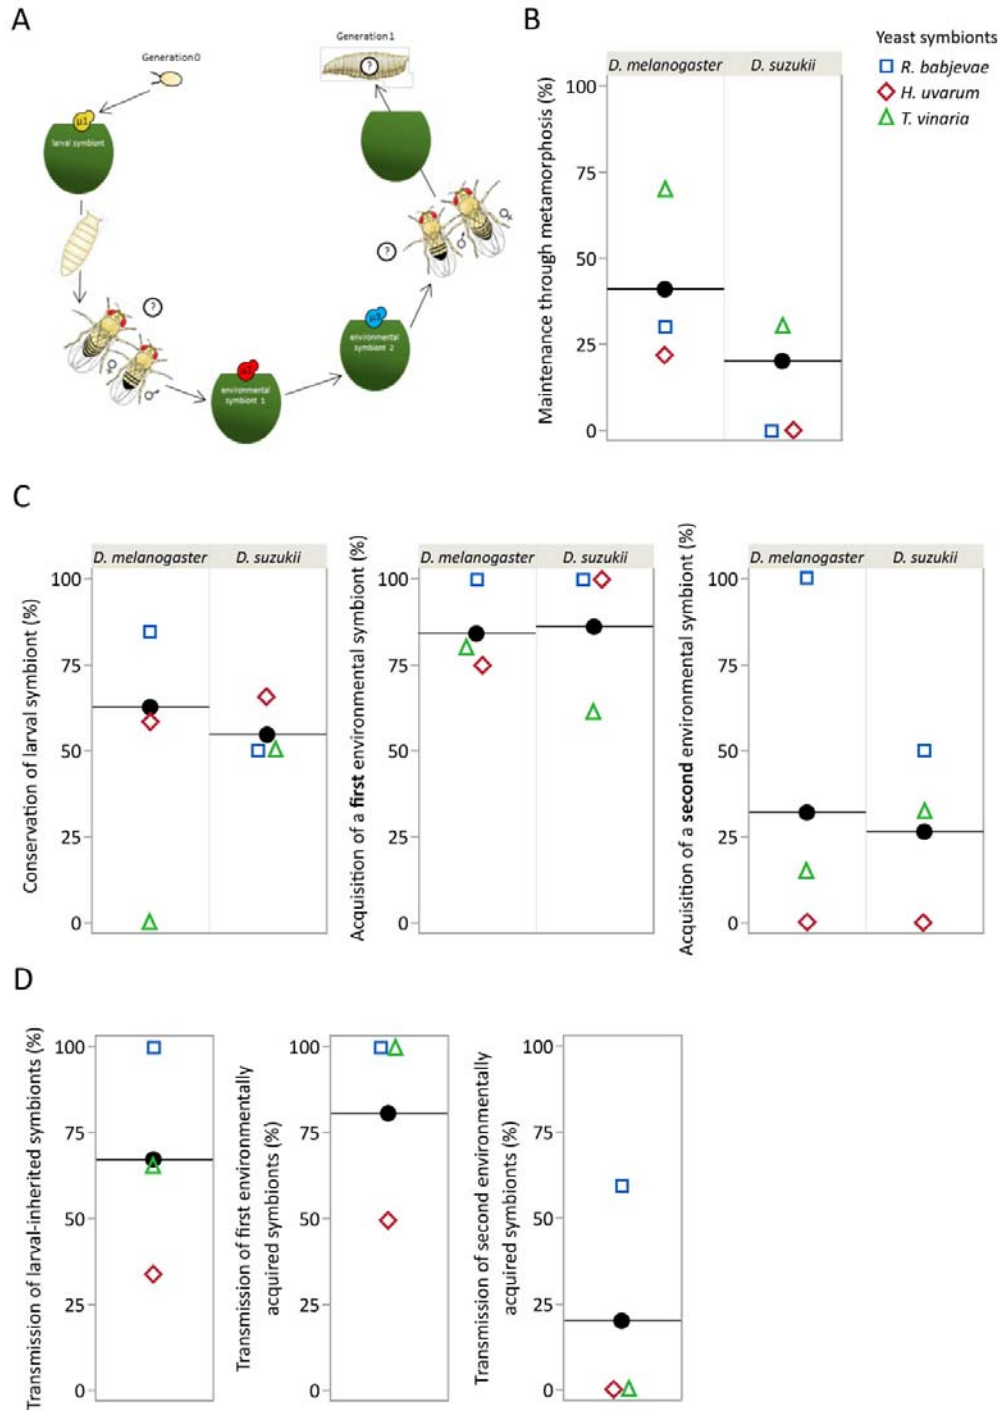

186

187 **Figure 3.** Larval yeast symbionts maintain through *Drosophila* stages and generations. (A)  
 188 Experimental design.  $\mu$  means microbial community. (B) Maintenance of symbionts through  
 189 metamorphosis. (C) Maintenance of larval symbionts and acquisition of environmental  
 190 symbionts in adults. (D) Transmission of the different adult symbionts to a new fly  
 191 generation. The black dot symbolizes the general mean (i.e. independently of the microbial  
 192 symbiont).

193

## 194 **Conclusion**

195 We discovered that *Drosophila* females and males both transmit their extracellular symbionts  
196 to larvae. Several symbiotic yeasts initially associated with larvae were conserved throughout  
197 host life cycle and transmitted to offspring. Our results, mainly obtained with microorganisms  
198 freshly isolated in the wild, suggest that stable associations of *Drosophila* flies with bacteria  
199 and yeasts may exist *in natura*. As our results were obtained under ecologically realistic  
200 conditions, they may therefore constitute a tangible step forward in the understanding of wild  
201 *Drosophila* - microorganism symbioses.

202 A major issue in the recent *Drosophila* literature is to determine how exactly microbial  
203 symbionts maintain association with the host. Most studies conclude *Drosophila* microbial  
204 symbionts do not maintain durably in the host. Symbionts would be continuously inoculated  
205 by the host to the substrate where they multiply, reacquired from the environment via a  
206 ‘farming’ mechanism but rarely conserved in absence of intake during feeding. However, this  
207 phenomenon has been described using laboratory strains of *Drosophila* and symbionts under  
208 typical laboratory conditions (Blum *et al.* 2013; Storelli *et al.* 2018). Along these lines,  
209 several studies show extracellular symbionts found in arthropods reflect the microbial  
210 communities they encounter in their diet (Kennedy *et al.* 2020; Moran *et al.* 2019). By  
211 contrast, evidence of the existence of resident extracellular symbionts of *Drosophila*  
212 accumulates. In *D. melanogaster* adults, two recent independent studies show that wild  
213 isolates of the bacteria *Lactobacillus plantarum* and *Acetobacter thailandicus* may durably  
214 colonize the first gut region of the host (crop, crop duct and proventriculus) independently of  
215 the ingestion of other symbionts under laboratory conditions (Pais *et al.* 2018; Obadia *et al.*  
216 2017). In the wild, such resident symbionts may durably persist in host individuals and  
217 populations. Our study was not designed to investigate how and why extracellular *Drosophila*  
218 symbionts persist in or get lost by adult hosts. However, we found symbionts maintain  
219 throughout metamorphosis, a phenomenon that was poorly studied with wild strains in fruit  
220 (Bakula 1969; Ridley *et al.* 2012; Starmer *et al.* 1988). Differences among yeasts strains in  
221 terms of maintenance and transmission may relate to where they locate in the host and  
222 therefore how we sampled them. Indeed, the yeast *Trigonopsis vinaria* we isolated from  
223 *Drosophila* ovaries best maintained throughout metamorphosis (Figure 4B). However,  
224 *Hanseniaspora uvarum*, a species frequent on the surface of fruit (Morais *et al.* 1995), that

225 strongly attracts *Drosophila* adults and is often found associated with them, always  
226 transmitted well from adults to larvae (Figures 2 and 3). If it is not possible to generalize with  
227 a handful of microbial strains, the data suggests wild symbionts vary in their strategies of  
228 host-mediated dispersal (Jacob *et al.* 2019). Most yeast species rely on insect vectors for  
229 dispersal (Kurtzman *et al.* 2011), some may be better at attracting adults, others at  
230 transmitting among life stages or to offspring. Recent literature debates whether yeast  
231 coevolve with flies on the basis that the volatiles they produce have other functions than just  
232 to attract flies (Günther *et al.* 2019; Koerte *et al.* 2020). The contingency of each other's  
233 fitness due to yeast maintenance during metamorphosis and transmission from adults to larvae  
234 constitutes another coevolutionary paradigm. One where symbiotic associations are not solely  
235 driven by partner choice but also by co-transmission (Sachs *et al.* 2004). When host and  
236 symbiont fitnesses correlate positively selection favors mutualistic interactions (Ebert 2013;  
237 Lipsitch *et al.* 1996; Sachs *et al.* 2004). In *Drosophila*, benevolent effects of extracellular  
238 symbionts may amount to better provisioning of nutrients (Ankrah & Douglas 2018) or host  
239 protection against pathogens (Johnston & Rolff 2015). Future research will tell whether yeast  
240 - and symbiotic bacteria - harbor adaptations favoring long-term associations with hosts and  
241 maximize their own fitness by mutualistic influence on their host.

242 Symbiont persistence has broad consequences for the eco-evolutionary dynamics of host and  
243 symbionts in heterogeneous environments. The maintenance of symbionts over days or  
244 generations enables their participation to host adaptation to local conditions. In return  
245 benevolent symbionts may benefit improved dispersal to new resource patches. For that  
246 matter, orchards, shrubs and cities where *Drosophila* and their symbionts may be encountered  
247 resembles the very definition of meta-populations: fruits are ephemeral patches of finite  
248 resources from which it is necessary to disperse to survive in the long run. Incidentally,  
249 understanding how hosts acquire and transmit non-obligatory symbionts, such as the bacteria  
250 and yeast we studied here, helps with a major challenge for the years to come. The ecological  
251 and evolutionary dynamics of most microorganisms in space and time remains obscure, in  
252 particular in structured, complex environments (Dudaniec & Tesson 2016). Empirical study of  
253 opportunistic symbionts in natural conditions or with field-realistic microcosms will shed  
254 light on some of this mystery.

## 255 **Materials and Methods**

### 256 ***Drosophila* stocks and microbial symbionts**

257 We used two populations of *Drosophila melanogaster* (Population A, founded from OregonR  
258 individuals furnished by colleagues, and Population B, founded from wild individuals  
259 collected in the late 2017 around Montpellier, Southern France) and two populations of *D.*  
260 *suzukii* (Population A, founded from wild individuals collected in the early 2018 around  
261 Avignon, Southern France, and Population B, founded from wild individuals collected in  
262 2013 in Gaujac, Southern France).

263 We used six microbial symbionts in this study. Five were isolated from wild flies and fruits in  
264 the late 2017. The yeasts *Hanseniaspora uvarum* MN684824, *Trigonopsis vinaria* MN684816  
265 and *Rhodotorula babjevae* MN684819 were isolated from female *D. melanogaster* feces, *D.*  
266 *suzukii* ovaries and infested organic grape berries, respectively. The bacteria *Serratia*  
267 *liquefaciens* and *Gluconobacter thailandicus* were respectively isolated from *D. suzukii*  
268 ovaries and organic grape berries. The sixth microorganism was a laboratory isolate of the  
269 bacterium *Lactobacillus plantarum* which is widely used in bacteria – *Drosophila* studies  
270 (Ryu *et al.* 2008). Colonies of these six isolates were distinguished according to their  
271 morphology (e.g. Figure 4). More details about these isolates (their choice, their properties,  
272 the method to distinguish them) will be given in the next version of this work.

273

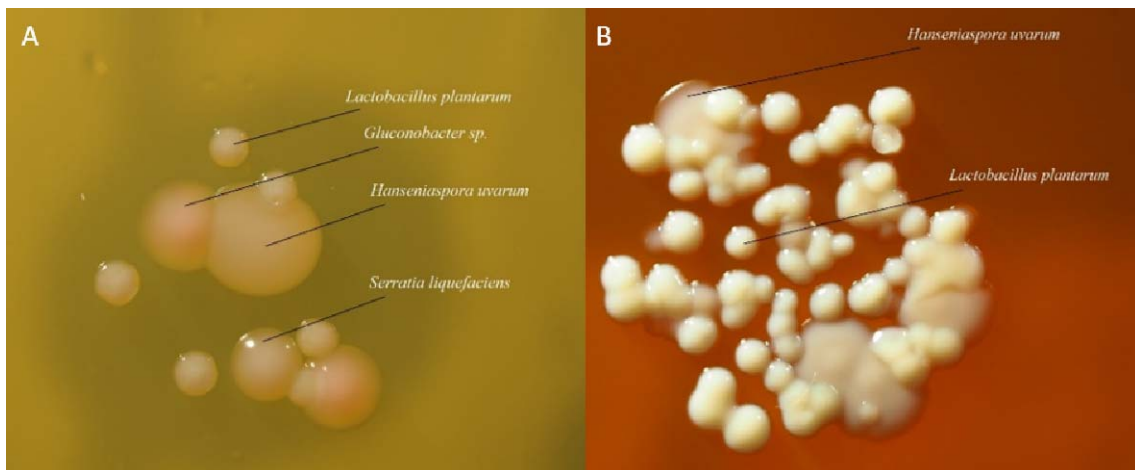

274

275 **Figure 4.** Colony morphology as a tool for discriminating mixed microbial isolates. (A) MRS  
276 agar plate (incubated at 30°C) allowed to distinguish colonies of four microbial isolates. (B)  
277 Mannitol agar plate (incubated at 24°C) allowed to distinguish colonies of two microbial  
278 isolates.

## 279 **Origin of larval microbiota**

280 The experiments were conducted on sterile vials with conventional blueberries and  
281 gnotobiotic *Drosophila* adults, i.e. associated with particular microbial symbionts.

282 Gnotobiotic adults were created by inoculating axenic larvae or adults (i.e. free of  
283 extracellular symbionts here) with overnight grown microbial symbionts (MRS 30°C for *L.*  
284 *plantarum*, Mannitol 24°C for other bacteria, YPD 24°C for yeasts). The axenic colonies of  
285 *Drosophila* were founded with axenic eggs obtained from conventionally reared populations  
286 using a method slightly adapted from Koyle and colleagues (2016). Briefly, this method  
287 consists of removing the chorion, the outer envelope of the egg that contains extracellular  
288 microbial symbionts. The axenic colonies were maintained on sterile banana medium (water,  
289 banana, sugar, dead yeast and agar).

290 Blueberries were always disposed with peduncle insertion upwards. This particular zone of  
291 the berry was identified as a preferential oviposition site for *D. suzukii* females (Figure 5). To  
292 allow oviposition of *D. melanogaster* females, this zone was finely wounded using a pipette  
293 tip. All blueberries used in the experiments were surface-sterilized following the protocol of  
294 Behar and colleagues (2008). For the two main experiments of this section, surface-sterilized  
295 blueberries were artificially associated with microbial symbionts. To this aim, berries were  
296 immersed in microbial suspensions (overnight microbial culture diluted in PBS (Phosphate  
297 Buffered Saline)) and dried 18 h after a 2 min 30 vortexing.

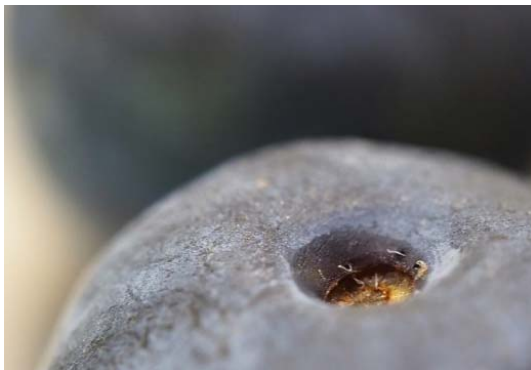

298

299 **Figure 5.** *D. suzukii* eggs are laid around the insertion of the fruit peduncle.

300

### 301 Maternal transmission

302 We used *D. melanogaster* population B, *D. suzukii* population B and the six microbial  
303 symbionts. Females were reared with males and associated with microbial symbionts five

304 days before the experiment. Each experimental unit was constituted of one mature female and  
305 a wounded (*D. melanogaster*) or intact (*D. suzukii*) blueberry. Female and fruit were  
306 associated with a different microbial community (i.e. a different bacterium and a different  
307 yeast). For this experiment only, blueberries were inoculated with two different  
308 concentrations of microbial symbionts: a low concentration (5000 cells per microbial  
309 symbiont, decided in the light of previous estimates of cell numbers deposited by insects on  
310 fruit surfaces) and a high concentration (50 000 cells per microbial symbiont). Our initial goal  
311 was to test whether the concentration of fruit-associated microbial symbionts influences their  
312 transmission to the larvae, that was not the case (Table S1). A wet sterile cotton piece was  
313 added into each vial to ensure adult hydration. We created 36 female-fruit microbial  
314 combinations \* two concentrations = 72 vials per *Drosophila* species. Females were disposed  
315 on fruits at 5 pm for 24 h. Controls without females were created to detect potential  
316 exogenous extracellular microorganisms. Adults were collected at the end of the day, crushed  
317 in PBS + 20% glycerol and stocked at -80°C. After five days, up to ten larvae were collected  
318 per fruit, pooled and crushed in PBS using a Tissue Lyser II. Right after crushing, larval  
319 samples were simultaneously plated on Galactose, Glucose, Mannitol (incubation at 24°C)  
320 and MRS plates (incubation at 30°C) to differentiate between and count microbial symbionts.  
321

### 322 Male-mediated transmission

323 We used *D. melanogaster* population B, *D. suzukii* population B and the six microbial  
324 symbionts. The used adults were obtained from larvae associated with a combination of one  
325 yeast and one bacterium. Emerging male and female adults were kept five days in the same  
326 vials then separated per sex and re-associated with the original yeast + bacterium  
327 combination. Each experimental unit was constituted of one mature female, one mature male  
328 and a wounded (*D. melanogaster*) or intact (*D. suzukii*) blueberry. Prior to the experiment,  
329 each female, male and fruit were associated with a different microbial community (i.e. a  
330 different bacterium and a different yeast). For this experiment, blueberries were inoculated  
331 with 5000 microbial cells of each symbiont. A wet sterile cotton piece was added into each  
332 vial to ensure adult hydration. Per *Drosophila* species, we created 36 vials, one for each male-  
333 female-fruit microbial combination. In the early morning, the male was placed on the vial to  
334 enable the deposition of its microbial symbionts on the fruit surface. Note we verified the  
335 capability of males to deposit their symbionts on the fruit surface during a preliminary essay,  
336 this data will be presented in the next version of this work. To encourage the male to sit on the

337 fruit, an axenic mature female kept in a small cage was added to the system (Figure 6). Male  
338 presence on the oviposition site was recorded eight times along the day. In the early morning  
339 of a second day, the captive axenic female was removed from the vial and the free-living  
340 gnotobiotic female was added. Male presence on the oviposition site was recorded eight times  
341 along this second day. Mating was also recorded every 30 min. Controls without females and  
342 males were created to detect potential exogenous extracellular microorganisms. Individuals  
343 were collected at the end of the second day, crushed in PBS + 20% glycerol and stocked at -  
344 80°C. After five days, up to ten larvae were collected per fruit, pooled and crushed in PBS  
345 using a Tissue Lyser II. Right after crushing, larval samples were simultaneously plated on  
346 Galactose, Glucose, Mannitol (incubation at 24°C) and MRS plates (incubation at 30°C) to  
347 differentiate between and count microbial symbionts.

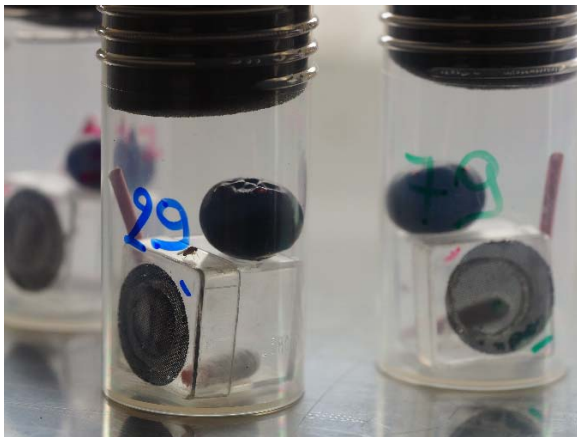

348

349 **Figure 6.** Example of experimental units used to test male transmission (on the first day, with  
350 a free-living gnotobiotic male and an axenic female in cage).

351

## 352 **Maintenance and transmission of microbial symbionts throughout the** 353 **insect life cycle and between generations**

354 We used *D. melanogaster* population B, *D. sukukii* population A and the three yeast isolates.  
355 Grape juice plates supplemented with the antifungal cycloheximide (1 µl/10 ml) were used to  
356 obtain yeast-free eggs from conventionally reared females. Eggs were deposited on surface-  
357 sterilized, incised grape berries (Behar et al., 2008) disposed on sterile vermiculite. After egg  
358 deposition, the wounds were inoculated with a single yeast strain (from overnight culture in  
359 YPD at 24°C). After the end of pupal formation, fruits were removed. Five freshly emerged  
360 adults of each sex were collected to evaluate yeast persistence through host metamorphosis.  
361 Other adults were placed in new experimental units. Each experimental unit was constituted

362 of one male and one female that were reared with the same yeast strain. A petri dish with a  
363 wet cotton piece and sugar was disposed in the system to ensure fly survival. Right after  
364 setting of the system, a first grape berry inoculated with a second yeast strain was added.  
365 After five days, the fruit was removed and a second grape berry inoculated with a third yeast  
366 strain was added. Two days after, the fruit was removed and an incised, surface-sterilized  
367 grape berry was added to collect larvae. After one day, the adults were collected. Three days  
368 after, larvae were aseptically removed from fruit flesh. All adult and larval samples were  
369 crushed in PBS right after their collect using a Tissue Lyser II (Qiagen) and plated on  
370 Galactose and Glucose plates to differentiate and count yeast symbionts.

371

## 372 **Statistical analyses**

373 GLM models with binomial distribution and logit function or poisson distribution and log  
374 function were used using JMP (SAS, 14.1). A backward stepwise model selection was used to  
375 eliminate non-significant terms from initial full models.

376

## 377 **Acknowledgements**

378 We thank Laure Benoit, Marie-Pierre Chapuis and Romain Gallet for their help for the  
379 molecular identification of the microbial isolates used in this study and during the preliminary  
380 experiments.

381

## 382 **References**

383 Ankrah, N. Y. D., & Douglas, A. E. (2018). Nutrient factories: Metabolic function of  
384 beneficial microorganisms associated with insects. *Environmental Microbiology*, 00, 1–10.

385 Antonovics, J., Wilson, A. J., Forbes, M. R., Hauffe, H. C., Kallio, E. R., Leggett, H. C.,  
386 Longdon, B., Okamura, B., Sait, S. M., & Webster, J. P. (2017). The evolution of  
387 transmission mode. *Philosophical Transactions of the Royal Society B: Biological Sciences*,  
388 372(1719), 20160083.

389 Bakula, M. (1969). The persistence of a microbial flora during postembryogenesis of  
390 *Drosophila melanogaster*. *Journal of Invertebrate Pathology*, 14(3), 365–374.



- 391 Becher, P. G., Flick, G., Rozpedowska, E., Schmidt, A., Hagman, A., Lebreton, S., Larsson,  
392 M. C., Hansson, B. S., Piškur, J., Witzgall, P., & Bengtsson, M. (2012). Yeast, not fruit  
393 volatiles mediate *Drosophila melanogaster* attraction, oviposition and development.  
394 *Functional Ecology*, 26(4), 822–828.
- 395 Behar, A., Jurkevitch, E., & Yuval, B. (2008). Bringing back the fruit into fruit fly-bacteria  
396 interactions. *Molecular Ecology*, 17(5), 1375–1386.
- 397 Blum, J. E., Fischer, C. N., Miles, J., & Handelsman, J. (2013). Frequent replenishment  
398 sustains the beneficial microbiome of *Drosophila melanogaster*. *MBio*, 4(6).
- 399 Bright, M., & Bulgheresi, S. (2010). A complex journey: transmission of microbial  
400 symbionts. *Nature Reviews Microbiology*, 8(3), 218.
- 401 Drapeau, M. D., Fuller, B. F., Rauser, C. L., & Long, A. D. (2011). Repeated mating in a lek-  
402 mating insect, *Drosophila melanogaster*. *Dros. Inf. Serv.*, 84, 136–140.
- 403 Dudaniec, R. Y., & Tesson, S. V. M. (2016). Applying landscape genetics to the microbial  
404 world. *Molecular ecology*, 25(14), 3266–3275.
- 405 Duneau, D. F., & Lazzaro, B. P. (2018). Persistence of an extracellular systemic infection  
406 across metamorphosis in a holometabolous insect. *Biology Letters*, 8–11.
- 407 Ebert, D. (2013). The epidemiology and evolution of symbionts with mixed-mode  
408 transmission. *Annual Review of Ecology, Evolution, and Systematics*, 44, 623–643.
- 409 Fisher, R., Henry, L., Cornwallis, C., Kiers, E., & West, S. (2017). The evolution of host-  
410 symbiont dependence. *Nature Communications*, 8, 15973.
- 411 Funkhouser, L. J., & Bordenstein, S. R. (2013). Mom Knows Best: The Universality of  
412 Maternal Microbial Transmission. *PLoS Biology*, 11(8), 1–9.
- 413 Gerardo, N., & Hurst, G. (2017). Q&A: Friends (but sometimes foes) within: The complex  
414 evolutionary ecology of symbioses between host and microbes. *BMC Biology*, 15(1), 4–9.
- 415 Gonella, E., Crotti, E., Rizzi, A., Mandrioli, M., Favia, G., Daffonchio, D., & Alma, A.  
416 (2012). Horizontal transmission of the symbiotic bacterium *Asaia* sp. in the leafhopper  
417 *Scaphoideus titanus* Ball (Hemiptera: Cicadellidae). *BMC Microbiology*, 12(Supp1), 1–13.
- 418 Günther, C. S., Knight, S. J., Jones, R., & Goddard, M. R. (2019). Are *Drosophila* preferences  
419 for yeasts stable or contextual? *Ecology and Evolution*, 9(14), 8075–8086.

- 420 Hoffmann, A. (1987). A laboratory study of male territoriality in the sibling species  
421 *Drosophila melanogaster* and *Drosophila simulans*. *Animal Behaviour*, 35, 807–818.
- 422 Hoffmann, A., & Cacoyianni, Z. (1990). Territoriality in *Drosophila melanogaster* as a  
423 conditional strategy. *Animal Behaviour*, 40(3), 526–537.
- 424 Jacob, S., Chaîne, A. S., Huet, M., Clobert, J., & Legrand, D. (2019). Variability in Dispersal  
425 Syndromes Is a Key Driver of Metapopulation Dynamics in Experimental Microcosms. *The*  
426 *American Naturalist*, 194(5), 613–626.
- 427 Johnston, P. R., & Rolff, J. (2015). Host and Symbiont Jointly Control Gut Microbiota during  
428 Complete Metamorphosis. *PLoS Pathogens*, 11(11).
- 429 Kennedy, S. R., Tsau, S., Gillespie, R., & Krehenwinkel, H. (2020). Are you what you eat? A  
430 highly transient and prey-influenced gut microbiome in the grey house spider *Badumna*  
431 *longinqua*. *Molecular Ecology*, 29(5), 1001–1015.
- 432 Kikuchi, Y., Hosokawa, T., & Fukatsu, T. (2007). Insect-Microbe Mutualism without Vertical  
433 Transmission: a Stinkbug Acquires a Beneficial Gut Symbiont from the Environment Every  
434 Generation. *Appl. Environ. Microbiol.*, 73(13), 4308–4316.
- 435 Koerte, S., Keeseey, I. W., Easson, M. L. A. E., Gershenson, J., Hansson, B. S., & Knaden, M.  
436 (2020). Variable dependency on associated yeast communities influences host range in  
437 *Drosophila* species. *Oikos*, oik.07180.
- 438 Koyle, M. L., Veloz, M., Judd, A. M., Wong, A. C. N., Newell, P. D., Douglas, A. E., &  
439 Chaston, J. M. (2016). Rearing the Fruit Fly *Drosophila melanogaster* Under Axenic and  
440 Gnotobiotic Conditions. *Journal of Visualized Experiments*: *JoVE*, 113, e54219.
- 441 Kurtzman, C. P., Fell, J. W., & Boekhout, T. (2011). *The Yeasts - Fifth edition*.
- 442 Lewis, M., & Hamby, K. (2019). Differential impacts of yeasts on feeding behavior and  
443 development in larval *Drosophila suzukii* (Diptera: Drosophilidae). *Scientific Reports*, 9(1),  
444 1–12.
- 445 Lipsitch, M., Nowak, M. A., & Siller, S. (1996). The evolution of virulence in pathogens with  
446 vertical and horizontal transmission. *Evolution*, 50(5), 1729–1741.
- 447 Ma, D., & Leulier, F. (2018). The importance of being persistent: The first true resident gut  
448 symbiont in *Drosophila*. *PLOS Biology*, 16(8), e2006945.

- 449 Miest, T. S., & Bloch-Qazi, M. C. (2008). Sick of mating sexual transmission of a pathogenic  
450 bacterium in *Drosophila melanogaster*. *Fly*, 2(4), 215–219.
- 451 Morais, P. B., Martins, M. B., Klaczko, L. B., Mendonca-Hagler, L. C., & Hagler, A. N.  
452 (1995). Yeast succession in the amazon fruit *Parahancornia amapa* as resource partitioning  
453 among *Drosophila* spp. *Applied and Environmental Microbiology*, 61(12), 4251–4257.
- 454 Moran, N. A., Ochman, H., & Hammer, T. J. (2019). Evolutionary and Ecological  
455 Consequences of Gut Microbial Communities. *Annual Review of Ecology, Evolution, and*  
456 *Systematics*, 50(1), 451–475.
- 457 Obadia, B., Güvener, Z. T., Zhang, V., Ceja-Navarro, J. A., Brodie, E. L., Ja, W. W., &  
458 Ludington, W. B. (2017). Probabilistic Invasion Underlies Natural Gut Microbiome Stability.  
459 *Current Biology*, 27(13), 1999-2006.
- 460 Pais, I. S., Valente, R. S., Sporniak, M., & Teixeira, L. (2018). *Drosophila melanogaster*  
461 establishes a species-specific mutualistic interaction with stable gut-colonizing bacteria. *PLoS*  
462 *Biology*, 16(7).
- 463 Quigley, K. M., Warner, P. A., Bay, L. K., & Willis, B. L. (2018). Unexpected mixed-mode  
464 transmission and moderate genetic regulation of *Symbiodinium* communities in a brooding  
465 coral. *Heredity*, 121, 524–536.
- 466 Reaume, C. J., & Sokolowski, M. B. (2006). The nature of *Drosophila melanogaster*. *Current*  
467 *Biology*, 16(16), 623–628.
- 468 Ridley, E. V., Wong, A. C. N., Westmiller, S., & Douglas, A. E. (2012). Impact of the  
469 resident microbiota on the nutritional phenotype of *Drosophila melanogaster*. *PLoS ONE*,  
470 7(5).
- 471 Rohlf, M., & Hoffmeister, T. S. (2005). Maternal effects increase survival probability in  
472 *Drosophila subobscura* larvae. *Entomologia Experimentalis et Applicata*, 117(1), 51–58.
- 473 Sachs, J. L., Mueller, U. G., Wilcox, T. P., & Bull, J. J. (2004). The evolution of cooperation.  
474 *The Quarterly Review of Biology*, 79(2), 135–160.
- 475 Shapiro, J. W., & Turner, P. E. (2014). The impact of transmission mode on the evolution of  
476 benefits provided by microbial symbionts. *Ecology and Evolution*, 4(17), 3350–3361.

- 477 Spencer, D. M., Spencer, J. F. T., De Figueroa, L., & Heluane, H. (1992). Yeasts associated  
478 with rotting citrus fruits in Tucumán, Argentina. *Mycological Research*, 96(10), 891–892.
- 479 Starmer, W. T., Peris, F., & Fontdevila, A. (1988). The transmission of yeasts by *Drosophila*  
480 *buzzatii* during courtship and mating. *Animal Behaviour*, 36(6), 1691–1695.
- 481 Stefanini, I., Dapporto, L., Legras, J. L., Calabretta, A., Di Paola, M., De Filippo, C., Viola,  
482 R., Capretti, P., Polsinelli, M., Turillazzi, S., & Cavalieri, D. (2012). Role of social wasps in  
483 *Saccharomyces cerevisiae* ecology and evolution. *Proceedings of the National Academy of*  
484 *Sciences of the United States of America*, 109(33), 13398–13403.
- 485 Storelli, G., Strigini, M., Grenier, T., Bozonnet, L., Schwarzer, M., Daniel, C., Matos, R., &  
486 Leulier, F. (2018). *Drosophila* Perpetuates Nutritional Mutualism by Promoting the Fitness of  
487 Its Intestinal Symbiont *Lactobacillus plantarum*. *Cell Metabolism*, 27(2), 362-377.
- 488 Taylor, C. E., & Kekic, V. (1988). Sexual Selection in a Natural Population of *Drosophila*  
489 *melanogaster*. *Evolution*, 42(1), 197.
- 490 Téfit, M. A., Gillet, B., Joncour, P., Hughes, S., & Leulier, F. (2018). Stable association of a  
491 *Drosophila*-derived microbiota with its animal partner and the nutritional environment  
492 throughout a fly population's life cycle. *Journal of Insect Physiology*, 106, 2–12.
- 493 Woltz, J. M., & Lee, J. C. (2017). Pupation behavior and larval and pupal biocontrol of  
494 *Drosophila suzukii* in the field. *Biological Control*, 110, 62–69.

495  
496
